# Supplementary material for: New Optimization Framework for Improvement Sustainability of Wastewater Treatment Plants
Source: MDPI journal article supplement (doi:10.3390/pr11113156), 2023-11-05
Supplement: s1 [file s1]

## **Supplementary Materials**

### **New optimization framework for improvement sustainability of wastewater treatment plants**

**Hang LI,<sup>1,2</sup> Fei PANG,<sup>2</sup> Di XU,<sup>3,\*</sup> Lichun DONG<sup>1,\*</sup>**

<sup>1</sup>School of Chemistry and Chemical Engineering, Chongqing University, Chongqing 400044, P. R. China

<sup>2</sup>Chongqing Three Gorges Water YuBei Drainage Co., Ltd., Chongqing 401120, P. R. China

<sup>3</sup>College of Chemistry and Chemical Engineering, Chongqing University of Science and Technology, Chongqing 400044, P. R. China

**Corresponding Authors:** Lichun Dong ([lcdong72@cqu.edu.cn](mailto:lcdong72@cqu.edu.cn)); Di Xu ([xdcq86@163.com](mailto:xdcq86@163.com))

**S1. Collected original data in the case study**

**S2. Normalized data in the interval CRITIC in the case study**

## S1. Collected original data in the case study

The original data in Tables S1-S3 were collected from Internal Research Report, Chongqing Three Gorges Water YuBei Drainage Co., Ltd.

Table S1. Original data of O<sub>1</sub> (discharged pollution reduction) with respect to taking each alternative retrofit technology

| Category | $\Delta BOD_5$ | $\Delta TN$ | $\Delta TP$ |
|----------|----------------|-------------|-------------|
| Unit     | mg/L           | mg/L        | mg/L        |
| T1       | -              | (0.8-1.5)   | -           |
| T2       | -              | -           | (0.2-0.4)   |
| T3       | -              | (1.5-4.5)   | (0.1-0.1)   |
| T4       | (0.5-1.0)      | (3.0-6.0)   | (0.1-0.1)   |
| T5       | (1.0-2.0)      | (1.5-3.0)   | (0.1-0.2)   |
| T6       | (1.0-1.0)      | (3.0-3.0)   | (0.1-0.2)   |
| T7       | -              | -           | -           |
| T8       | -              | -           | -           |
| T9       | -              | -           | -           |
| T10      | -              | -           | -           |

Note: “-” means no effect

Table S2. Original data of O<sub>2</sub> (operational cost reduction) with respect to taking each alternative retrofit technology

| Category | $OR_{Tj-energy}$   | $OR_{Tj-material}$ | $OR_{Tj-staff}$    | $OR_{Tj-other}$ (cost regarding sewage sludge) |
|----------|--------------------|--------------------|--------------------|------------------------------------------------|
| Unit     | CNY/m <sup>3</sup> | CNY/m <sup>3</sup> | CNY/m <sup>3</sup> | CNY/m <sup>3</sup>                             |
| T1       | (0.0292-0.0584)    | -                  | -                  | -                                              |
| T2       | -                  | (0.0066-0.0082)    | -                  | -                                              |
| T3       | (0.0155-0.0164)    | -                  | -                  | (0.0120-0.0301)                                |
| T4       | -                  | +(0.0699-0.0699)   | -                  | +(0.006-0.012)                                 |
| T5       | +(0.0350-0.0526)   | -                  | -                  | (0.0301-0.0301)                                |
| T6       | +(0.0088-0.0175)   | -                  | -                  | (0.012-0.012)                                  |
| T7       | (0.0443-0.0591)    | -                  | +(0.0164-0.0164)   | (0.1505-0.1505)                                |
| T8       | -                  | -                  | +(0.0164-0.0164)   | (0.3010-0.4013)                                |
| T9       | +(0.2066-0.2066)   | -                  | +(0.0164-0.0164)   | (0.4274-0.4274)                                |
| T10      | (0.0443-0.0443)    | -                  | +(0.0088-0.0088)   |                                                |

Note: “-” means no effect; “+” means increasement instead of reduction is found, highlighted with red color

Table S3. Original data of O<sub>3</sub> (GHG emissions reduction) with respect to taking each alternative retrofit technology

| Category | $CR_{Tj-electricity}$                 | $CR_{Tj-chemicals}$                   |
|----------|---------------------------------------|---------------------------------------|
| Unit     | kg CO <sub>2</sub> -eq/m <sup>3</sup> | kg CO <sub>2</sub> -eq/m <sup>3</sup> |
| T1       | (0.034-0.069)                         | -                                     |
| T2       | -                                     | (0.018-0.018)                         |
| T3       | (0.018-0.019)                         | -                                     |
| T4       | -                                     | +(0.009-0.009)                        |
| T5       | +(0.041-0.062)                        | -                                     |
| T6       | +(0.010-0.021)                        | -                                     |
| T7       | (0.052-0.070)                         | -                                     |
| T8       | -                                     | -                                     |
| T9       | +(0.049-0.049)                        | -                                     |
| T10      | (0.052-0.052)                         | -                                     |

Note: “-” means no effect; “+” means increasement instead of reduction is found, highlighted with red color; the GHG emissions regarding the sewage sludge treatment is not considered in Table S3.

## S2. Normalized data in the interval CRITIC in the case study

Table S4. Normalized data in the interval CRITIC in the case study

| $\left[ \bar{z}_{ij}^L, \bar{z}_{ij}^U \right]$ | O <sub>1</sub> | O <sub>2</sub> | O <sub>3</sub> |
|-------------------------------------------------|----------------|----------------|----------------|
| T <sub>1</sub>                                  | [0.083, 0.167] | [0.238, 0.301] | [0.732, 0.993] |
| T <sub>2</sub>                                  | [0.333, 0.667] | [0.190, 0.193] | [0.609, 0.609] |
| T <sub>3</sub>                                  | [0.250, 0.667] | [0.234, 0.275] | [0.609, 0.617] |
| T <sub>4</sub>                                  | [0.500, 1.000] | [0.000, 0.013] | [0.402, 0.402] |
| T <sub>5</sub>                                  | [0.500, 1.000] | [0.127, 0.165] | [0.000, 0.157] |
| T <sub>6</sub>                                  | [0.667, 0.833] | [0.164, 0.182] | [0.314, 0.392] |
| T <sub>7</sub>                                  | [0.000, 0.000] | [0.558, 0.589] | [0.868, 1.000] |
| T <sub>8</sub>                                  | [0.000, 0.000] | [0.785, 1.000] | [0.471, 0.471] |
| T <sub>9</sub>                                  | [0.000, 0.000] | [0.613, 0.613] | [0.101, 0.101] |
| T <sub>10</sub>                                 | [0.000, 0.000] | [0.252, 0.252] | [0.868, 0.868] |
